# Supplementary material for: Upwelling and isolation in oxygen-depleted anticyclonic modewater eddies and implications for nitrate cycling
Source: Copernicus journal article supplement (doi:10.5194/bg-2016-34), 2016-03-11
Supplement: Supplementary file [file bg-2016-34-AC1-supplement.pdf]

# Detailed response to reviewers comments

---

We thank both the reviewers for encouraging but also critical words. We have revised and restructured the text. We hope that the new version is not only better synthesizing our results but further addresses adequately the points were improvements have been suggested by the reviewers.

## Anonymous Referee #1

### General Comments

The present article presents a series of observational surveys relating the existence of an oxygen-deprived mesoscale eddy core in the North Atlantic to near-inertial wave dynamics and (maybe) large-scale Ekman transport. A sequence of observations and hypotheses are suggested to account for the fact that the eddy is mostly isolated from the outside waters, but not quite. I'm actually still confused about what stays in the eddy and what gets in and out, but amendments to the articles should remedy it. At least that's my take on it is but, but I am just a physical oceanographer and I don't spend much of my time thinking about biogeochemistry.

In general, the processing is well done, and the graphic depictions and the accompanying text show convincing signals, raising interesting scientific questions. I would be very happy if the authors left it at that, and maybe tried their hand at process guessing in a discussion section, with larger error bars around their allegations. But in my opinion, they stretch the interpretation of their data way too far about how things are fluxed in and out of the eddy (or not), and how it explains the property structure inside of it. As far as I understand the article, they just see very interesting patterns, but are not able to prove many pieces of their model anyway. Either they are wrong, in which case this piece of text will fall into oblivion (although fig. 7 might unintentionally enjoy some form of posterity), or they are right, and the credit will go to whoever is able to prove this mechanism. Either way, I don't think they'll get citations for that part of the text. And I don't think that the article needs that to be publishable. Unless this model heavily relies on data published in other articles of their series, in which case they should consider publishing a separate article, because no-one has the time to read a whole series.

Considering that 12 co-authors could have proof-read it, the number of typos and English mistakes is rather large, even for non-native speakers. Not being a native English speaker myself, I have to let the editorial staff to correct these mistakes, but I have a list of my own if needed. Quite often, the authors prefer to use common words rather than field-specific terms

(‘normal eddy’, ‘erosion’), which would be fine if it didn’t lead to ambiguities.

We thank the reviewer for the detailed and very useful comments. Based on the reviewer comments we hope that we were able to better (as far as it is possible based on the data at hand) discuss the physical processes that are at work in the eddy.

Based on the data at hand we can describe the stratification, currents, and biogeochemical characteristic of the eddy, and also some temporal evolution. We refer to results published elsewhere in order to interpret what we observe. The paper by Sheen et al. (2015) that describes the Near Inertial Wave (NIW) propagation in and around a Modewater eddy (deep Southern Ocean eddy) based on observational (microstructure) data. Sheen et al. found by applying a ray trace model to the observed N2 profiles, that the core of the eddy does allow only a selected range of incidence NIW to enter. All other NIW were reflected at the periphery of the core at the N2 maximum and wave/wave interaction was suggested to generate observed enhanced mixing. One part which was misinterpreted in the last version was related to the NIW propagation in regions where  $f_{\text{eff}} < f$ . Indeed NIW can propagate in region with  $f_{\text{eff}} < f$  such as the core the anticyclone. However, more relevant is the region just outside the eddy and were the horizontal velocity shear generates  $f_{\text{eff}} > f$  (e.g. Halle and Pinkel 2003; Fig. 16). Here, NIW generated in an f-region are forced to propagate downward to depth. Enhanced mixing by shear instabilities from NIW currents that periodically enhance the background flow have been reported (Kawaguchi et al. 2016).

The comments about the quality of the writing are fully to the account of the lead author. In fact, the Guest Editor had kindly provided a proofread version that could have been used for initial publication – but unfortunately the file was “overlooked” by the lead author in the submission process. All comments have been considered in the revised version.

## Specific Comments:

I will now switch to ‘you’ when referring to the authors.

1. P01L32: you and I seem to disagree on the specific definition of the submesoscale range. Some authors have it ranging from 1-10 km (10.1029/177GM04), some others have it ranging from 1-50 km or even 1-100 km (10.1038/ncomms7862), but everyone seems to agree on a key value of 10 km at mid-latitudes, and  $Ro, Ri = O(1)$  in general (which is perhaps the universally accepted definition). I’m fairly confident when I say that 1 km as an upper bound is too low, and 10 meters is too small, by a long shot. There has to be some influence of the Coriolis force, that I’m certain of.

A very valid comment – for the submesoscale range we followed the recent definition given by McWilliams (2016): “To be more quantitative, the approximate scale ranges for SMCs (*submesoscale currents*) are  $l=0.1–10\text{km}$  in the horizontal,  $h=0.01–1\text{ km}$  in the vertical, and hours-days in time (except for some submesoscale coherent vortices (SCVs) that can wander around in the vertical interior with lifetimes of years).”

1st paragraph of the intro: I'm not sure how useful this paragraph is.

This is true - we have shortened the paragraph, omitted the eddy detection sentences and restructured the paragraph.

P09, last paragraph (continued P10): I don't understand this. Why would the accumulation of NIW energy in high-N environments around an eddy shield it from mixing? If you accumulate NIWs anywhere, they tend to break, and bring mixing right at the door of the core. It sounds like planting wasp nests around one's house to prevent a wasp invasion. The whole article is confusing actually. I didn't understand it until way after, when you showed fig. 7.

We are sorry for the confusion. We take from this comment that the reviewer finally (fig. 7) understood the mechanism but not in this paragraph where it was described. As a consequence we re-wrote the paragraph (but also the introduction paragraph on lowering/increasing  $f$  around anticyclonic eddies and the impact on the propagation of NIW). It is also of important to mention that we wrongly interpreted the  $f_{\text{eff}}$  pattern. It is in fact not the lowering of the planetary vorticity in the core of ACME/AC but the increase in  $f_{\text{eff}}$  at the transition zone between the eddy and the surrounding waters that forces NIW to propagate downward and eventually cause mixing (see e.g. Halle and Pinkel 2003; Fig. 16). This correction also required some modification on figure 7 – which might be appreciated by this particular reviewer mentioning some concerns with the graphical realisation.

P10L4-12: I am not sure what this paragraph is about. My take on it: does mixing work differently for nutrients than it does for other quantities? But I'm still unsure of the answer.

Our intention was to discuss differences in surface signatures of nutrient upwelling (primary productivity) – is it more at the edge of an eddy or in the centre? The paragraph did not consider other quantities. However, we re-wrote the paragraph.

P10L22-29: A bit of ray tracing would not add much work, and could greatly improve the credibility of your hypothesis.

We do not see reasons to question the applicability of the Sheen et al. (2015) ray tracing to the ACME we observe. The ray tracing is based on an N2 profiles only and the Sheen at all and our N2 look very similar. Moreover, enhanced mixing at the N2 maximum in an ACME was also recently reported for an Arctic eddy (Kawaguchi et al. 2016) and that further support our interpretation of the data. What we actually miss in our observations is microstructure data that would help to quantify the mixing efficiency across an ACME.

P11L14-26: my take from this paragraph: there is now an exchange pathway between the

mixed layer and the core. Then what about everything you said in the preceding paragraphs?  
Is there a contradiction or is this a different issue?

The exchange is focussed at the rim or edge – here is where we observe the NIW to propagate downward. The NIW also propagate “outward” from the N2 maximum (see Sheen et al. 2015, Kawaguchi et al. 2016). There is no evidence from our data that support an exchange of the core with the surroundings. The term “erosion” should emphasize that the mixing is just on one side of the eddy - “outward” from the N2 maximum” and the core properties are largely unaffected. The term erosion has been used in the past in describing process that operate at the edge of warm core eddies (citation: “note that lateral intrusion and mixing on the sides of the eddy are contributing most to its erosion” Kroll, 1993).

P12L29-P13L15: Same problem as above. I don't find this paragraph very convincing. It is an interesting scenario, but fig. 7 is not substantiated by diffusive fluxes measurement/estimates. If Beal 2007 actually has something to say about it, you might want to use her article more, not cite her in passing. My suggestion is that this part be moved to the discussion section, with a much more honest depiction of how little you know about why some properties are exchanged, and why some others aren't, and with a much more measured use of process-based interpretations (at least for the physical processes; I can't judge the chemistry part).

Indeed we can argue only based in what has been reported by others on mixing in ACMEs (shallow ACME: Kawaguchi et al. 2016); deep ACME (Sheen et al. 2015). We followed your advice and move this part to the end of the paper.

P11L11-15: I thought I knew what flux was until I read these sentences. What do you mean by flux? Advective flux, diffusive flux? What do you mean by erosion? What does the phrase ‘NO<sub>3</sub>-/oxygen from the eddy core is primarily outward’ mean? Why would a flux necessarily transfer stuff from the outside? Are you talking about a mass flux, which in all rigour should be advective? Or a diffusive flux, in which case you may or may not be right depending on the concentration distribution? And what non-dimensional number quantifies the statement ‘erosion rather than flux’?

We suspect you mean P13L11—15? The problem with a gradient flux considering an advective/diffusive balance is that it would EXCHANGE properties – hence the core would be altered in its properties (e.g.  $S_a / \Theta$ ). What we actually observe is a remarkable constant T/S (and a decrease in oxygen over time – see figure below). The observations of a maximum in mixing efficiency at the N2 maximum by Sheen et al. (2015) and Kawaguchi et al. (2016), combined with the minimum in mixing efficiency in the core of the ACME (that is in-line with the NIW propagation pathways as simulated by Sheen et al. 2015) support an “erosion” scenario. With

“erosion” we mean a “shrinking” of the ACME core. We modified the text in order to make this point more clear. The TS diagram may further help – it shows the eddy core profiles from the two glider surveys. What can be seen is that the TS in the core is very stable but that mixing at the edges has “eroded” or shrunken the core.

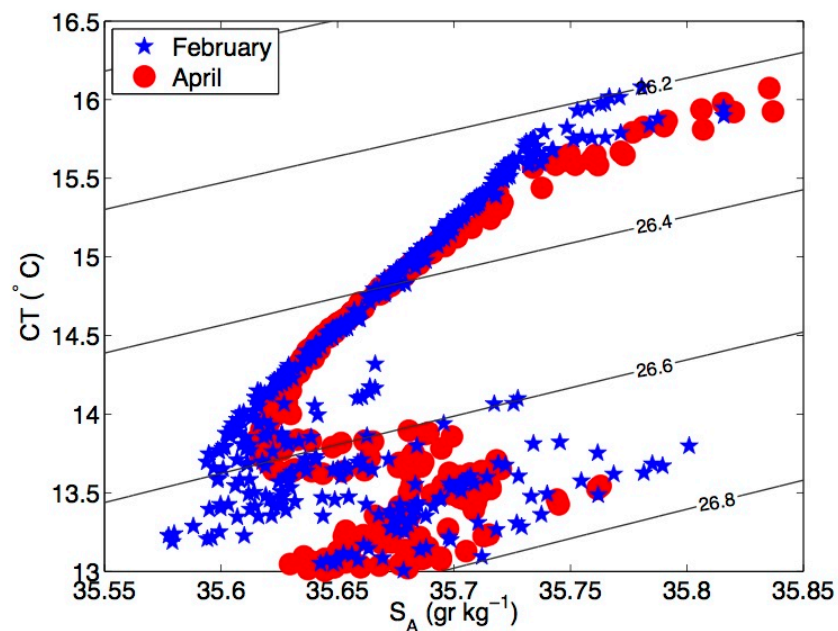

P11L27-32 and figure 5b: are this paragraph and figure the only ones that actually lay out your case for an influence of Ekman transport on the ACME? If so, it is a very weak case, not enough to make it to the body of the article in my opinion, and certainly not enough to make it to the abstract, Once again, it could make it to the discussion section, in passing. Thomas 2005 considers a wildly different parameter regime by the way, I don't see how it can help you support your case without more calculations.

We agree and removed the paragraph.

P09L13: Could the low oxygen property have originated from the coast and simply have been transported all the way to here? I know that you report a decrease from 8 to 3 micromoles/grams over the course of the experiment, but I don't know the error bars on these measurements. And as far as I can tell, you simply say at some point in the text that the signal looks real or something, but that's not quite the quantified statement, especially since so much hinges on it.

A very valid comment! We could show in the past (Karstensen et al. 2015, Fiedler et al. 2016, Schütte et al. 2016) that the low oxygen core did not originate from the coast. For example, direct observation of an Argo float with oxygen sensor that was trapped in a CE over a period of more than 7 month (Karstensen et al. 2015) from the upwelling region into the open North Atlantic showed a constant decrease in oxygen in the eddy core. Also from a number of direct observations of eddies that were surveyed shortly after they detached from the coast and many month later again (Karstensen et al. 2015, Fiedler et al. 2016, Schütte et al. 2016).

P14L23-25: 'The NIW concept (. . .) numerical models': it depends on which models you're talking about. Numerical process studies could resolve these sorts of scales (for a low-res version of what is achievable, see 10.1175/JPO-D-14-0097.1; I am not an author, and I am not suggesting that you cite it), and could be the most obvious types of studies that could substantiate the viability of your hypotheses. So, I'd like this sentence to be rephrased in order to sound less like 'mission accomplished' and more like 'idealised process studies are needed'

Thank you for the comment. Of course there are models that do resolve the scales and hopefully the processes. We rephrased the sentence accordingly.

## Technical Comments:

P01L14: extending from about 60 to 200 m depth and. . .? - done

P01L21: possibly -done

P02L03: 'has been conducted' => 'were conducted by Chaigneau. . . ' - sentence removed

P02L10-13: you are describing a vertical stacking, or a baroclinic structure. Took me a while to figure out that it wasn't a radial shielding structure. And what do you mean by 'normal'? Surface-intensified or barotropic? I don't see why one is more normal than the other anyway. I would also talk about ACEs rather than AEs, to be in line with ACMEs. And can't there be CMEs? – We rephrased the sentence and hope it is now clear that describe the stratification and the Mode. In the context of water masses the word "Mode" is often used for nearly homogenous properties such as for subtropical, or subpolar Mode Waters. We are not aware of a publication on "Cyclonic Modewater eddies" but would be happy to add a reference if the reviewer could provide one.

P02L26-29: something odd in that sentence. Perhaps the wrong verb ('explains') is used, or a comma is missing between 'ACME' and 'with', but something is odd. - we rephrased the

sentence.

P03L04: 'Mesoscale eddies often have  $Ro$  close to 1' => 'Although usually characterised by  $Ro$  « 1, mesoscale eddies often feature local values of  $Ro$  closer to one'. See my Special Comment 1 though: you might disagree with me. – We rephrased the sentence accordingly.

P03L25-26: 'the modelled . . . eddy core.' If that's the message of the paragraph, it should be placed at the beginning. – We rephrased the whole paragraph.

P03L29: by rim, do you mean top/bottom or lateral rim or both? I would say edge or boundary actually. Rim sounds like lateral boundaries, which is what you might be referring to. – We rephrased the sentence

P04L15: 'and that' => 'which' – We rephrased the whole paragraph.

P04L26: 'but purely opportunistic': huh? I think you can delete anyway, no one is judging. - was deleted

P06L10:  $S_A$  =>  $S_A$  -changed

P07L16-17: 'During the last survey. . . 120 m': I actually see two minima, both at 120 m. Do you mean in the vertical again? - The sentence referred to the vertical and we modified the sentence.

P08L06: I don't see how the spiciness section shows the contrasting impact of  $\Theta$  and  $S_A$  on isopycnals. I don't see  $\Theta$  at all actually, and I don't remember the definition of spice. -Spiciness is constructed to be a variable that is most sensitive to isopycnal thermohaline variations, and least correlated with the density field (Flambert 2002). Because both,  $\Theta$  and  $S_A$ , contribute to density it is redundant to analyse them jointly along isopycnals. We now added the definition for spiciness to the text (not the equation). The reason why  $\Theta$  is not shown is because not much can be learned from the section – but if the reviewer insists we could add it.

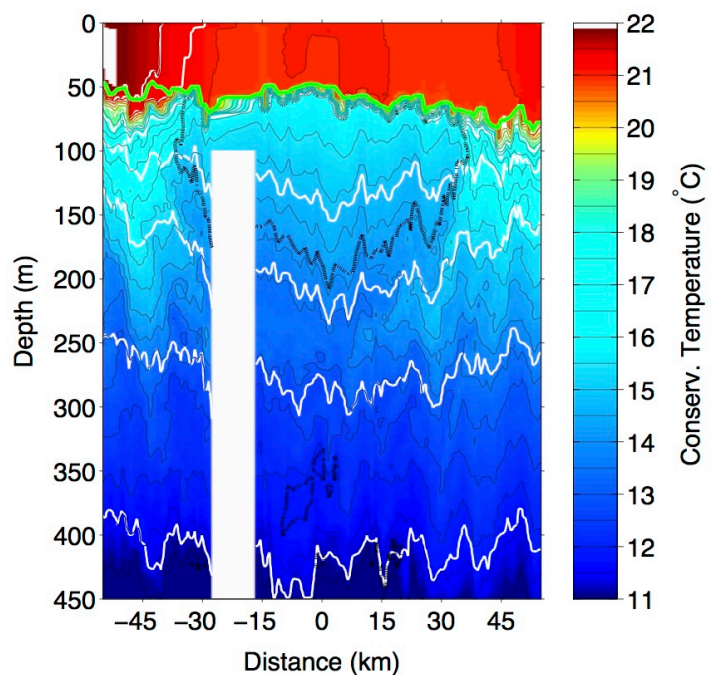

P08L13: 'but separating the eddy surrounding water from. . .' => 'but well separates the eddy core from the surrounding waters'. -we rephrased the sentence

P08L16: in the stability ratio, what is the z index supposed to mean? Besides, you mix up  $\theta$  and  $\Theta$  here and in subsequent lines. -It is the vertical gradient/contribution. An explanation for z was now added to the text. Thank you for mentioning the problem with  $\theta$  and  $\Theta$  which is related to using the word Equation editor or the symbol set.

P09L09: 'but for the deeper levels more' => 'but more for the deeper levels'? - Changed accordingly

P09L30: 'downward also': missing word in-between? - Changed sentence

P09L31: a word on what a typical AE stratification is? - Sentence was removed (whole section rephrased)

P09L34: 'and that also' => 'which also' - Changed sentence

P10L4-5: 'Having explained the isolation as..., it is tempting to... ' - Sentence was removed (whole section rephrased)

P10L06: what do you mean, 'concept'? conceptual model? - Sentence was removed (whole section rephrased)

P11L14: 'Only vertical propagation of internal waves does not generate mixing, but (...)' => 'Vertical propagation of internal waves by itself does not generate mixing. In order to do so, . . . ' - Changed sentence

P11L15: I find it hard to conceive critical layer absorption not followed by KH. - That is true and we changed the sentence

P11L19-20: 'Here the mean . . . vertical mixing': I don't understand this sentence. -Changed sentence: "Here the mean flow could gain energy from the NIW current that in turn could lead to energy dissipation because of the shear-instability (Kawaguchi et al. 2016)"

P12L25: Is the double minus in NO<sub>3</sub>- intentional? -Typo, Changed

P13L04: what's PON? - It stands for "Particulate Organic Nitrogen" (which is nitrogen that is part of particles made out of organic substances)

Fig. 7: A few of my colleagues (not in this field) and I unanimously agree: this figure looks too



much like a particular piece of anatomy. We all suggest that you change the aspect ratio, make it less symmetric, and/or replace the blue and yellow lines by different lines. Once seen, it can't be unseen. Besides that, I thought oxygen was not transported in an out of the eddy (P14L15), so what's up with the yellow lines? I'd also like to see arrowheads on the blue and yellow lines, even if bi-directional (I don't think they would be). Finally, I'd like to see the huge converging arrows towards the centre of the eddy removed. I get it that some stuff is retained inside the eddy, but let's not forget that in a vortex, geostrophic or not, velocities are mostly azimuthal. I understand that this is meant to reinforce your point, but in the end, it is misleading. Or make them squiggly, which would evoke diffusion. - [We discussed that online and some modification to the figure was needed.](#)

### **Reference:**

McWilliams JC. 2016 Submesoscale currents in the ocean. Proc. R. Soc. A 472: 20160117.  
<http://dx.doi.org/10.1098/rspa.2016.0117>

Halle, C., and R. Pinkel: Internal wave variability in the Beaufort Sea during the winter of 1993/1994, J. Geophys. Res., 108(C7), 3210, doi:10.1029/2000JC000703, 2003.

Kawaguchi, Y., S. Nishino, J. Inoue, K. Maeno, H. Takeda, and K. Oshima: Enhanced diapycnal mixing due to near-inertial internal waves propagating through an anticyclonic eddy in the ice-free Chukchi Plateau. J. Phys. Oceanogr., 46, 2457-2481, doi:10.1175/JPO-D-15-0150.1, 2016.

Flament, P: A state variable for characterizing water masses and their diffusive stability: spiciness, Progress in Oceanography 54, 493–501, 2002

## Anonymous Referee #2

### GENERAL COMMENTS

This work is a contribution to a special issue about "dead-zone eddies" in the Eastern North Atlantic (ETNA) where 6 manuscripts are currently available, 3 already reviewed and published in BG and the rest in discussion form.

To be concise I consider Karstensen et al. (BGD, 2016) needs MAJOR REVISION, the reasons are exposed below. My main concern about this work is the lack of a clear focus on the hypothesis, results and discussion, is it about chemical or physical oceanography?

Another important consideration is that I needed to read carefully four manuscripts within the special issue to deeply understand the results and the discussion, the manuscript (ms) is full of typos or miss- references to the figures. It seems that the authors did not check the ms coherence before submitting, this is a very bad point for their reputation. Considering the amount of coauthors an effort should have been done to ease the reading of the ms and make it a stand- alone work.

Despite this I think the ms merits to be published after some improvements both in content and layout. I understand that it is somehow difficult to organize the wealth amount of data recorded by the different surveys and observing platforms deployed to characterize this intriguing new dead zones in the ETNA. In addition this paper is mostly about physical oceanography, and I am a chemical oceanographer, maybe the ms needs a third opinion.

We thank the reviewer for encouraging but also critical words. Indeed it is a problem to publish papers that address the interaction of physical and biogeochemical processes. To our opinion the Guest editor did a very good job in selecting reviewers that, although addressing primarily points related to their own discipline (Reviewer 1 being a physical oceanographer, Reviewer 2 being a chemical Oceanographer), asked apparently "simple questions" on others discipline which are often the trickiest to answer. As Reviewer 2 will see, we have revised the text and reordered the content over many parts. We hope that the new version is now focussing to the point and thus is easier to read. We tried to simplify the physical and biogeochemical parts. However, certain parts might be difficult to fully understand by one or the other disciplinary reader.

Indeed the many typos in the submitted version go fully to the account of the lead author. In fact, the Guest editor had kindly provided a proofread version that could have been used for publication – but unfortunately the file was "overlooked" by the lead author in the submission process.

A fundamental issue is the prime hypothesis of this ms which is finally resolved in Fig.7, the authors propose a physical mechanism to explain the isolation of the eddy core but also another one (near inertial waves, NIW, breaking) to explain the flux of nutrients to the upper mixed layer. As the authors say in the text the evidences to support the physical mechanisms suffer from "not having concurrent hydrography and currents data and limited options for

estimating balances" (P14, L3-4). On the biogeochemical side, the authors only support their "nitrogen cycling" hypothesis with nitrate and oxygen data from the glider surveys, but other measurements are available from typical CTD casts as described in Fiedler et al. (BGD 2016).

A new publication in the physical mechanisms of mixing related to the ACME has been published in the meantime (Kawaguchi et al. 2016) that further supports our mixing/erosion of the eddy core. Of course we do not have other data at hand. However, we added one figure that nicely shows the high particle load that "rains" into the eddy core and which further supports the idea that particle sinking and remineralization is one key process in creating the low oxygen core. Fiedler et al. (2016) do not present AOU/NO<sub>3</sub> ratios but, the data

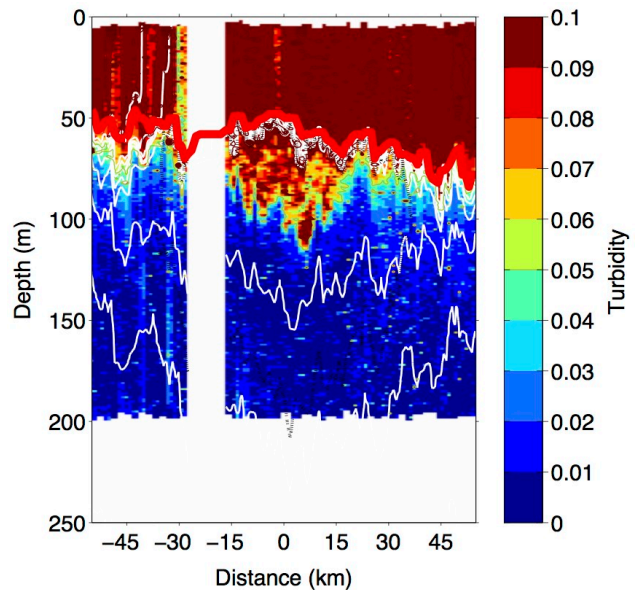

## SPECIFIC COMMENTS

### Introduction

Although the intro is rather long, just the last three lines contain some references to the other ms related to the studied Anticyclonic Mode Water Eddies (ACME) within the same project and using the same observing platforms. I think a comprehensive summary of the different genomic, biological and biogeochemical aspects of the ACMEs should be given, also highlighting the contribution of the current ms.

We re-wrote and restructured the introduction. In particular the eddy detection part was removed (irrelevant for the present study). Details about the different genomic, biological and biogeochemical aspects of the particular ACME that we investigate here will be given in an overview article for the special issue (In preparation).

### 2. Data and methods

#### 2.1. Glider survey

Maybe a word or reference about the interpolation method for the glider data would be interesting.

[A linear interpolation was applied \(now added to the text\)](#)

#### 2.2 Glider sensor calibration

Page5, line 16. I would like to see some number about oxygen precision and accuracy, as done for nitrate (P6, L7-8). Although more details about this are surely given in Hahn et al 2014, please consider my demand.

Sorry for not providing the errors estimates. The comparison between calibrated (by titration of oxygen samples) Clarke sensor on the CTD and the calibrated optode data suggests an overall (full oxygen range) RMS error of  $3 \mu\text{mol kg}^{-1}$ . However, for the chemically forced zero oxygen an RMS error of  $1 \mu\text{mol kg}^{-1}$  is expected. We added the information to the text.

### 2.3. Ship survey

I do not understand why not using the biogeochemical data gathered during M105, at least  $\text{NO}_3$ ,  $\text{PO}_4$ ,  $\text{O}_2$ , particulate and dissolved organic matter, to sustain your biogeochemical interpretation of the results. More comments about this issue will be given in the corresponding section of the ms.

-As outlined under the specific points below, we primarily reference to the published figures in the accompanying articles.

## 3. Results and Discussion

3.1 Vertical Eddy Structure Biogeosciences is not "Journal of Physical Oceanography" so my excuses for not understanding all the difficult terms in this section. As the aim of the ms is explaining the "fluxes of nitrate" into the mixed layer supporting the high primary production in the ACME, my opinion is that an effort should be done to make the ms more readable for the ocean biogeochemical community.

-We hope that that by rewriting the manuscript over large parts has fixed this issue.

P9L5-9. I checked (I read) Fiedler et al 2016 and I did not find any explanation about the translational velocity of the ACME, I found this information in Karstensen et al (BG 2015).

In section "3.1. Eddy Characteristics" Fielder et al. discuss the translation velocity. However, numbers are given in Karstensen et al. (2015) and Schütte et al. (2016). We changed accordingly.

3.2 Eddy core isolation and vertical fluxes. Please check the figure references in this section, it is a mess!! It was very hard to follow the result description and the final message to be conveyed.

P9-L13 no reference to limnic systems is given in Karstensen et al (2015). -In the abstract of Karstensen et al. (2015) it says: "...create the "dead zone" inside the eddies, so far only reported for coastal areas or lakes." – with "lakes" we anticipated limnic systems.

P9-L19: the nonlinearity parameter is not defined or commented previously in this work but in Karstensen et al (2015). Please explain why alpha is important for the coherence of the eddy but it does not matter to explain isolation. -Eddies might be separated into linear waves (also called "Rossby Waves") or in isolated, coherent structures. The non-linearity parameter is a measure to judge if the feature is a linear wave (translation speed and rotation speed are similar) or a coherent eddy (rotation speed much higher than translation) with a different dynamical regime. We refer in the text to the isolation of the core against lateral or vertical mixing – maybe shielding for mixing is a better formulation? The paragraph has been rewritten.

P10-L2-3. Weird phrase. – Indeed, but the paragraph has been completely rewritten and the sentence is removed.

P11. A mess with the figure references. Please just for the biogeochemist summarize where would NIW brake and induce mixing / fluxes in the eddy structure.

- We rephrased the sentences and hope that we provide with Figure 7 a good overview about where exactly mixing occurs.

P11-L8-9. "no concurrent velocity and stratification section data exists" I do not understand, you have velocity and CTD casts from the ship so at least you have 8 stations. –We did that when estimating the gradient Richardson number (P11L8) but the statistical significance is very low.

### 3.3 Nutrient budget.

This section should be entitled "nitrate budget"... but not even so... as no budget is estimated, a better title would be "nitrate cycling" .

- This is true and we changed that accordingly

My main concern about this section the rejection of using other biogeochemical data from the ship surveys within the ACMEs. For example why not using the M105 NO<sub>3</sub> and AOU data in Fig 6c?, they crossed the eddy center as showed in Fig 2b.

– It is less a “rejection” but the wish to avoid showing plots that have been presented by other authors already. On the left a summary of NO<sub>3</sub>:AOU from cruise data at different locations.

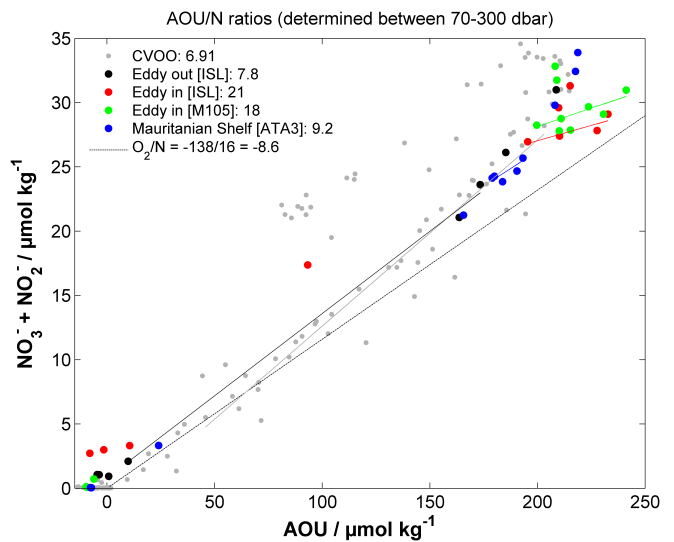

An evidence of denitrification would be a differential NO<sub>3</sub>:PO<sub>4</sub> ratio.

- The NO<sub>3</sub>:PO<sub>4</sub> ratio has been presented in Löscher et al. (2015) in Figure 3c. The glider survey does not provide PO<sub>4</sub> data – as such it is unclear what the bottle NO<sub>3</sub>/PO<sub>4</sub> figure would add to our discussion? Probably the Löscher et al. (2015) was not sufficiently cited?

After reading several times this section, the main question is how are the nutrients injected into the mixed layer to support primary production?. However no profile of chlorophyll is given (I found some info about this in Loscher et al. BG 2015) , I wonder if the gliders have at least a backscattering or fluorometer sensor.

- We added new figures on turbidity and fluorescence that hopefully now show better the particle sinking (turbidity) and the fluorescence peak in the mixed layer/at the mixed layer base.

The biogeochemical info in Fiedler et al BGD 2016 in the shelf, CVOO and the eddies may help to explain the high primary production (PP), if eddies are formed in the shelf, they contain nutrients that are used and converted into organic matter (particulate and dissolved) that sinks

and is remineralized in the eddy creating the O<sub>2</sub> minimum. Is it enough the initial NO<sub>3</sub> in the shelf to sustain PP in the eddy when it moves into the ETNA?. Does it really need an extra NO<sub>3</sub> input?

- The problem is the process that refuels the euphotic zone of the eddy with nutrients. It is not a problem of the initial nutrient content in the eddy core. The process we propose (and that alters fundamentally the NO<sub>3</sub>:AOU ratio) is a recycling of nutrients, which in turn is the results of the specifics of upwelling in the eddy. We would not call that an “extra NO<sub>3</sub>” but a recycling that alters the AOU/NO<sub>3</sub> ratio. Figure 4 in Fiedler et al. (2016) shows the profiles from the cruises as well as from the shelf. It can be seen that the shelf water are lower in NO<sub>3</sub> (and higher in O<sub>2</sub>)

It is very hard to understand a decoupled O<sub>2</sub> and NO<sub>3</sub> cycle if denitrification is not important. Please check the NO<sub>3</sub>:PO<sub>4</sub> ratio. An anomalous O<sub>2</sub>:NO<sub>3</sub> ratio could be related to the stoichiometry of the organic matter remineralized both particulate and dissolved, please check the available data.

-In Löscher et al. (2015) (and in Grundle et al. submitted) the nitrogen loss by denitrification was in the nanomolar range but the nitrate deficit is in the micromolar range. In fact the conceptual model we provide here should explain exactly this disequilibrium without the need of denitrification (conceptualized through Figure 7).

For our concept the key is that the specific mixing (created by the submesoscale dynamics in and around the eddy) is taking away (“erosion”) part of the eddy core. This part has high NO<sub>3</sub>/low O<sub>2</sub> water enters by mixing induced pathways the mixed layer/euphotic zone. However, once in the mixed layer the pathways of the high NO<sub>3</sub> and the low O<sub>2</sub> water are different. The low O<sub>2</sub> water will lower the oxygen content in the mixed layer (being now undersaturated in oxygen) but which is refuelled by air/sea gas exchange. In contrast, the high NO<sub>3</sub> water is used for PP in the mixed layer and, through PP is incorporated into particles (as PON). The particles (with the PON) sink out of the mixed layer back into the core. This some of the NO<sub>3</sub> is re-entering the mixed layer. Essentially this is a gravitational process and O<sub>2</sub> does not participate in it.

#### 4. Summary and conclusions

I suppose it would need to be rewritten depending on the results from section 3.3.

-We have rewritten the section 4 and hope to made the points now more clear.

I hope to have been helpful.

-Definitely – Thank you!
